# Supplementary material for: B-Type Natriuretic Peptide at Admission Is a Predictor of All-Cause Mortality at One Year after the First Acute Episode of New-Onset Heart Failure with Preserved Ejection Fraction
Source: MDPI journal article supplement (doi:10.3390/jpm12060890), 2022-05-28
Supplement: s1 [file s1]

**Table S1.** Transthoracic echocardiography at admission in 91 patients with HFpEF.

| Characteristics                                      | Value                     |
|------------------------------------------------------|---------------------------|
| <i>Left ventricle</i>                                |                           |
| LV end-diastolic diameter, mm, mean±SD (95%CI)       | 47.64±5.48 (46.50-48.78)  |
| LVEF, vol %,median (IQR)                             | 55 (10)                   |
| Septal s velocity, cm/s, mean±SD (95%CI)             | 6.22±1.20 (5.97-6.47)     |
| Lateral s velocity, cm/s, mean±SD (95%CI)            | 7.35±1.30 (7.08-7.62)     |
| Left ventricle mass, g/m <sup>2</sup> , median (IQR) | 122 (37)                  |
| LVOT VTI, cm, median (IQR)                           | 18.60 (7)                 |
| Stroke volume, mL, median (IQR)                      | 62 (26)                   |
| LA index volume, mL, mean±SD (95%CI)                 | 51.67±12.11 (49.15-54.19) |
| E/e' ratio, mean±SD (95%CI)                          | 14.51±4.61 (13.55-15.47)  |
| E/e' ratio, median (IQR)                             | 14 (6)                    |
| E/e' ratio>9, n (%)                                  | 82 (90.10%)               |
| E/e' ratio>14, n (%)                                 | 47 (51.60%)               |
| Septal e' velocity<7 cm/s, n (%)                     | 65 (71.40%)               |
| Lateral e' velocity<10 cm/s, n (%)                   | 67 (73.60%)               |
| <i>Right ventricle, IVC, and right atrium</i>        |                           |
| Free wall RV S<9.5, n (%)                            | 12 (13.20%)               |
| TAPSE<17 mm, n (%)                                   | 23 (25.30%)               |
| RA area over 18 cm <sup>2</sup> , n (%)              | 63 (69.2%)                |
| IVC over 21mm, n (%)                                 | 40 (44%)                  |
| IVC collapse<50%, n (%)                              | 35 (38.50%)               |
| PAPS, mm Hg, mean±SD (95%CI)                         | 40.79±14.93 (37.68-43.90) |
| PAPS>35 mm Hg, n (%)                                 | 59 (64.80%)               |

HF: heart failure, Hb: Hemoglobin, HR: heart rate, IQR: interquartile range, IVC: inferior vena cava, MI: Myocardial Infarction, PAPS: systolic pulmonary artery pressure, SaO<sub>2</sub>: arterial oxygen saturation, SBP: systolic blood pressure, TAPSE: tricuspid annular plane systolic excursion, LA: left atrium, LV: left ventricle; LVEF: Left ventricle ejection fraction, LVOT VTI: left ventricular outflow tract velocity time integral; RA: right atrium, RV: right ventricle.

**Table S2.** Univariate analysis for NT-proBNP ≥ 2910 pg/ml to be-predictors.

| Crt | Variable                               | Omnibus Nagelkerke R test | Square | Hosmer and Lemeshow Test | p-value regression coefficient | AUROC | p-value AUROC |
|-----|----------------------------------------|---------------------------|--------|--------------------------|--------------------------------|-------|---------------|
| 1   | Age                                    | 0.024                     | 0.073  | 0.309                    | 0.030                          | 0.647 | 0.016         |
| 2   | Medical history of atrial fibrillation | 0.005                     | 0.109  | -                        | 0.034                          | 0.634 | 0.028         |
| 3   | eGFR (mL/min/1.73 m <sup>2</sup> )     | 0.002                     | 0.137  | 0.768                    | 0.004                          | 0.669 | 0.006         |
| 4   | TAPSE                                  | 0.016                     | 0.083  | 0.194                    | 0.021                          | 0.658 | 0.009         |
| 5   | LAVi (mL/m <sup>2</sup> )              | 0.001                     | 0.173  | 0.920                    | 0.001                          | 0.716 | 0.001         |
| 6   | IVC collapse<50%                       | 0.025                     | 0.072  | -                        | 0.028                          | 0.614 | 0.06          |
| 7   | Right Atrium area > 18cm <sup>2</sup>  | 0.020                     | 0.077  | -                        | 0.023                          | 0.612 | 0.06          |

|   |                            |       |       |       |       |       |       |
|---|----------------------------|-------|-------|-------|-------|-------|-------|
| 8 | Length of in-hospital stay | 0.064 | 0.050 | 0.110 | 0.089 | 0.605 | 0.086 |
| 9 | Stroke volume              | 0.087 | 0.042 | 0.040 | 0.094 | 0.618 | 0.054 |

**Table S3.** The odds ratio for the increased NT-proBNP  $\geq 2910$  pg/ml.

| No. | Predictor                                 | Odds ratio | Lower limit 95% CI | Upper limit 95% CI | p-value |
|-----|-------------------------------------------|------------|--------------------|--------------------|---------|
| 1   | Age > 73 years                            | 3.712      | 1.557              | 8.851              | 0.003   |
| 2   | Medical history of atrial fibrillation    | 3.671      | 1.428              | 9.441              | 0.007   |
| 3   | eGRF $\leq 80$ ml/min/1.73 m <sup>2</sup> | 4.957      | 1.815              | 13.537             | 0.002   |
| 4   | TAPSE $\leq 22$ mm                        | 5.984      | 1.969              | 18.183             | 0.001   |
| 5   | LAVi > 54 ml/m <sup>2</sup>               | 5.208      | 1.943              | 13.961             | 0.002   |

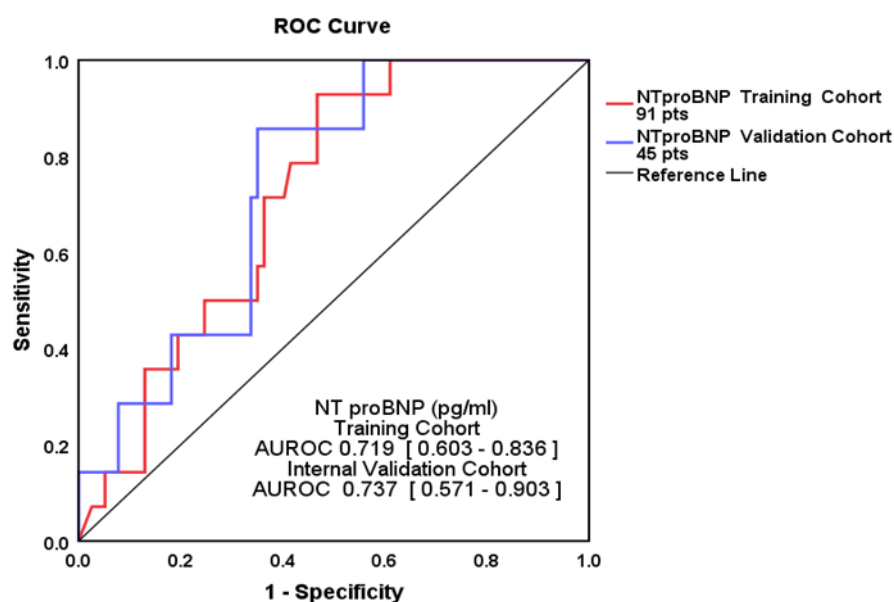

**Figure S1.** NT-proBNP as a predictor of all-cause mortality at 12 months from the first episode of HFpEF (red), and its' internal validation (blue) (Hanley & McNeil test,  $p = 0.82$ ).
